# Supplementary material
Source: Springer Nature journal article supplement (https://www.springermedizin.de/resource/supplementary/12933_2013_778_MOESM4_ESM.pdf/9539208)
Supplement: MOESM4 [file 9539208]

## Additional Figure 2

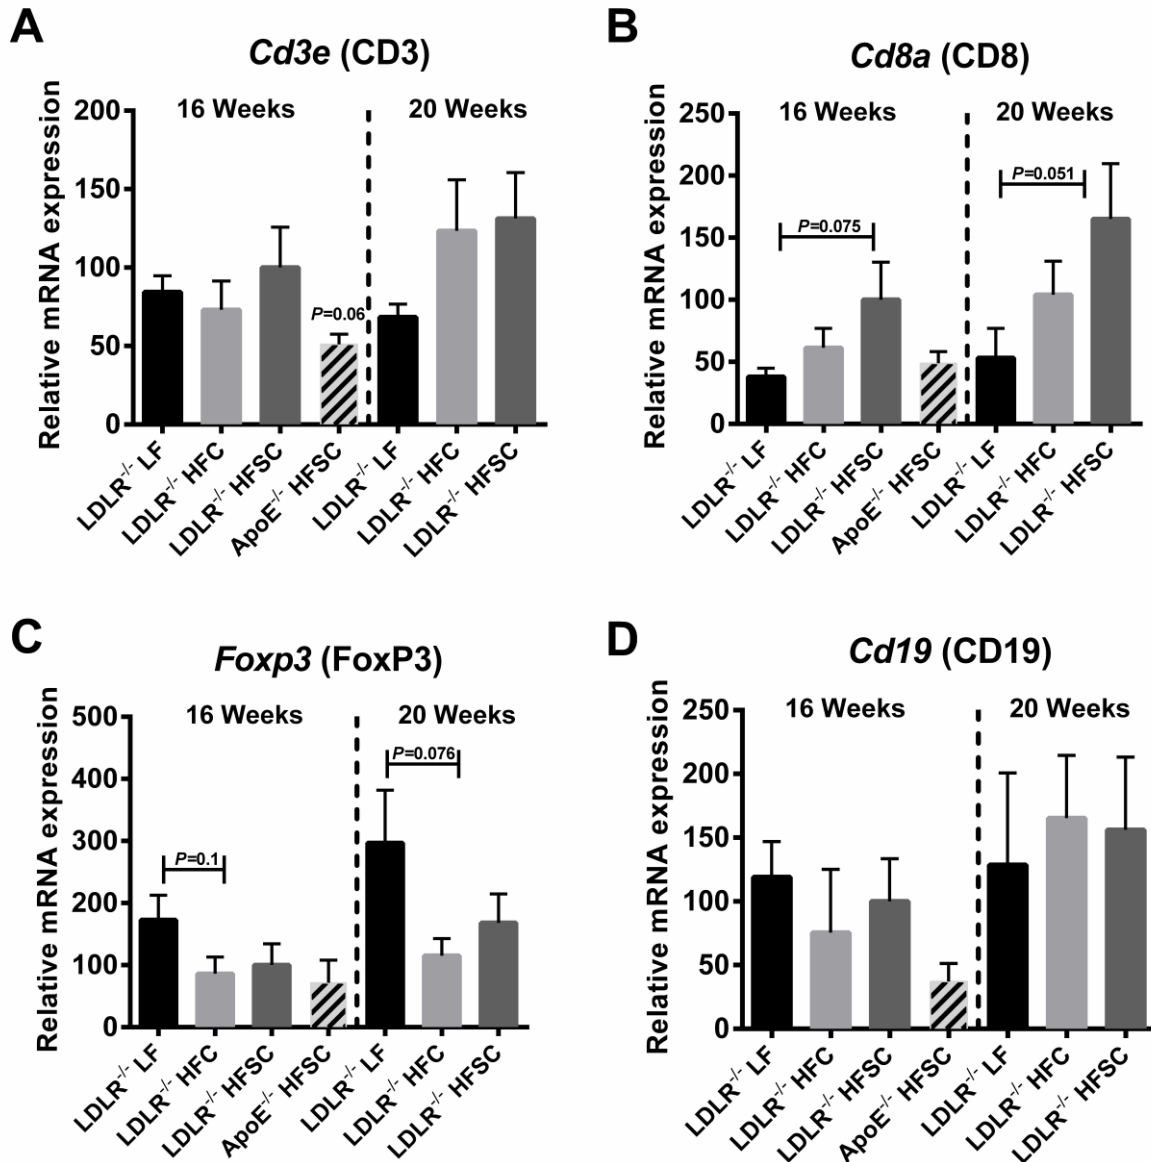

**Additional Figure 2:** LDLR<sup>-/-</sup> mice were fed HFSC, HFC or LF for 16 weeks or 20 weeks ( $n = 6$  animals per group). ApoE<sup>-/-</sup> mice were fed HFSC for 16 weeks ( $n = 8$  animals per group). Gonadal adipose tissue expression of the marker genes for pan-T cells (*Cd3e*) (A), cytotoxic (*Cd8a*) (B), and regulatory T cells (*Foxp3*) (C) as well as B cells (*Cd19*) (D) was analyzed by real-time RT-PCR. For statistical analysis LDLR<sup>-/-</sup> mice fed HFSC or LF were compared with HFC-fed LDLR<sup>-/-</sup> mice. In addition, LDLR<sup>-/-</sup> and ApoE<sup>-/-</sup> mice both fed HFSC were compared. All data represent mean  $\pm$  SEM.
